# Supplementary material
Source: PubMed Central journal article supplement (PMC4029048)
Supplement: Supp_Figure1.pdf [file Supp_Figure1.pdf]

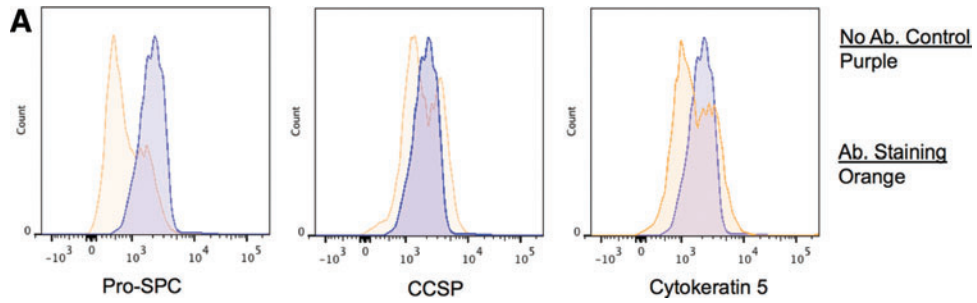

**SUPPLEMENTARY FIG. S1.** Whole, unfractionated human bone marrow cells as negative staining control for lung epithelial markers. (A) Unfractionated human bone marrow mononuclear cells were stained for lung epithelial markers: pro-SPC, Clara cell secretory protein (CCSP), and cytokeratin-5. There was no indication of unfractionated cells having positive marker expression. The purple peaks indicate no antibody control; the orange peaks indicate cells incubated with antibodies.
