# Supplementary material
Source: PubMed Central journal article supplement (PMC4029048)
Supplement: Supp_Figure2.pdf [file Supp_Figure2.pdf]

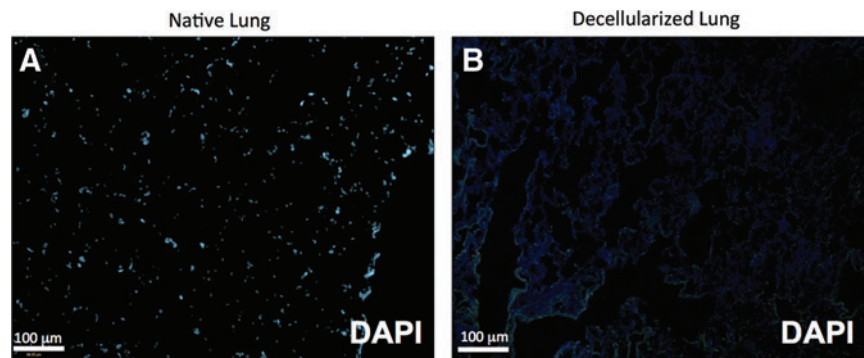

**SUPPLEMENTARY FIG. S2.** (A, B) DAPI staining is used to reveal nuclei in native (A) and absence of nuclei in decellularized lungs (B).
