# Supplementary material
Source: PubMed Central journal article supplement (PMC4029048)
Supplement: Supp_Figure7.pdf [file Supp_Figure7.pdf]

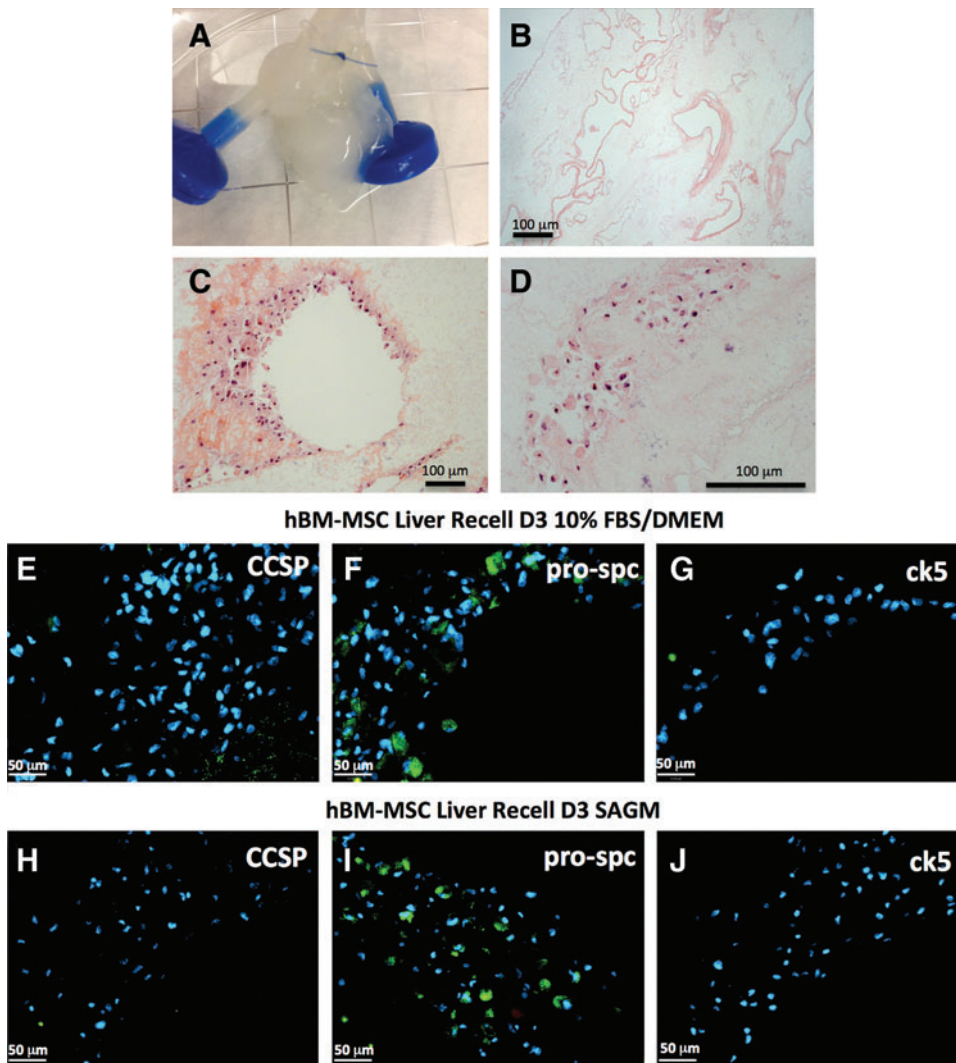

**SUPPLEMENTARY FIG. S7.** hBM-MSCs cultured on a decellularized liver matrix are morphologically different than those cultured on lung. **(A)** Whole-mount image of a decellularized liver. **(B)** H&E histology of the decellularized liver shows that there are no remaining cells on the matrix. **(C, D)** Reseeded liver slices were cultured in 10% FBS/DMEM **(C)** or in SAGM **(D)** for 3 days. Morphological comparison between these cells and those seeded on the lung (Fig. 2A) indicates a large difference in cell shape. Cells grown in either 10% FBS/DMEM or in SAGM were negative for CCSP and cytokeratin 5 **(E, G, H, J)**, whereas few cells remained positive for pro-SPC **(F, I)**.
